# Supplementary material for: A novel biosensor for copper(ii) ions based on turn-on resonance light scattering of ssDNA templated silver nanoclusters
Source: Royal Society of Chemistry journal article supplement (doi:10.1039/c4tb01940g), 2015-01-01
Supplement: c4tb01940g1.pdf [file c4tb01940g1.pdf]

*Electronic Supplementary Information*

**A novel biosensor for copper (II) ions based on turn-on  
resonance light scattering of ssDNA templated silver  
nanoclusters**

Da-Qian Feng, Guoliang Liu\*and Wei Wang\*

*School of Chemical and biological Engineering, Yancheng Institute of Technology, Jiangsu  
224051, China.*

*E-mail: liuguoliang188@126.com, wangw@ycit.edu.cn; Fax: (+86) 515-88298186*

**Table S1.** Comparison of the present assays with other reported methods for the detection of Cu<sup>2+</sup> in aqueous solution.

| Method                               | LOD             | Linearity        | Ref.      |
|--------------------------------------|-----------------|------------------|-----------|
| DNA-Ag NCs LS probe                  | 0.5 $\mu$ M     | 5-125 $\mu$ M    | 16a       |
| Fluorescent DNA-Ag NCs probe         | 8 nM            | 10-200 nM        | 21a       |
| PMAA-Ag NCs fluorescent probe        | 8 nM            | 10-6000 nM       | 21b       |
| ICP-AES                              | 4 nM            | -                | 21c       |
| ICP-MS                               | Several nM      | -                | 21d       |
| Fluorescent fiber optical probe      | 1.2 $\mu$ M     | 0.78-6.3 $\mu$ M | 21e       |
| CN-DPA fluorescent probe             | Several $\mu$ M | 2-5 $\mu$ M      | 21f       |
| Fluorescence turn-on probe           | 0.261 $\mu$ M   | -                | 21g       |
| RLS biosensor based on AGR of Ag NCs | 2 nM            | 5-750 nM         | This work |

-: The value was not provided in the literature.

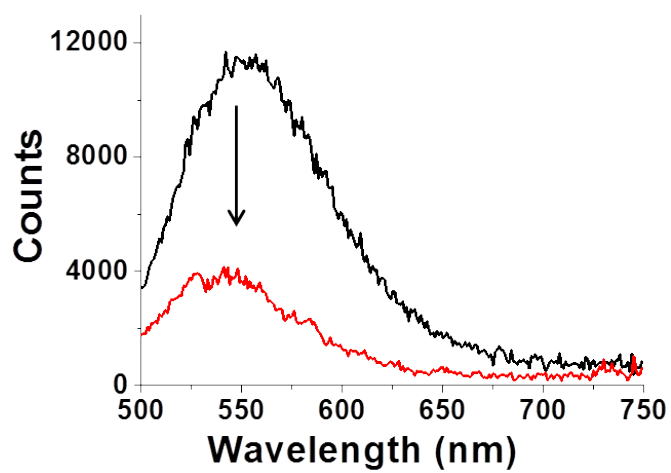

**Figure S1.** Emission spectra of ssDNA-Ag NCs in the absence (the black line) and presence (the red line) of the concentration of 80  $\mu\text{M}$   $\text{Cu}^{2+}$  ions solution.

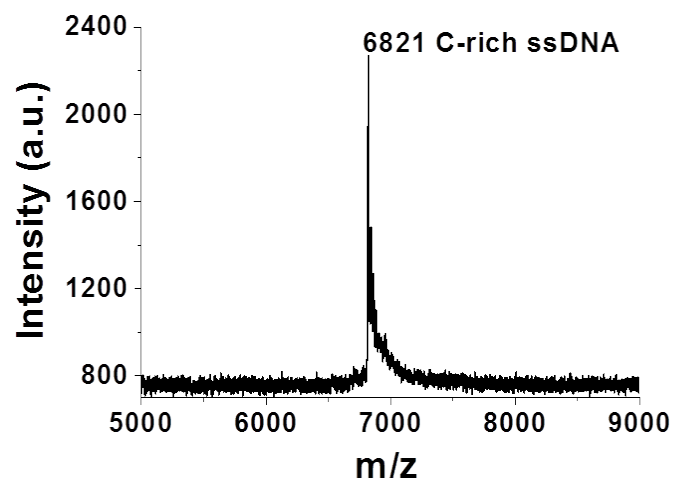

**Figure S2.** MALDI-TOF mass spectra of C-rich ssDNA.

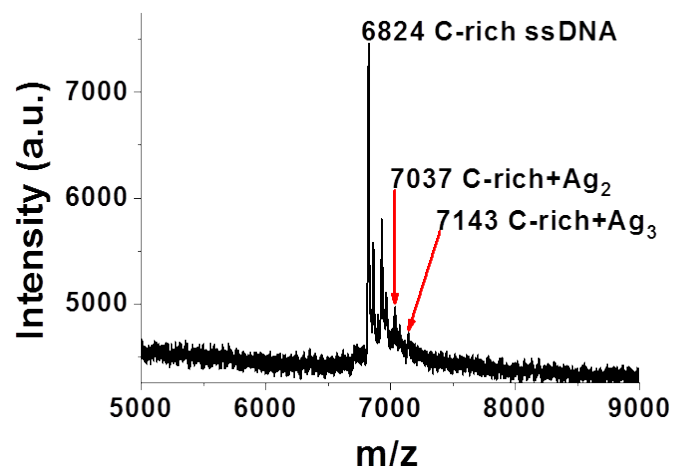

**Figure S3.** MALDI-TOF mass spectra of synthesized C-rich ssDNA templated silver nanoclusters in the absence of 1 mM Cu<sup>2+</sup> ions.

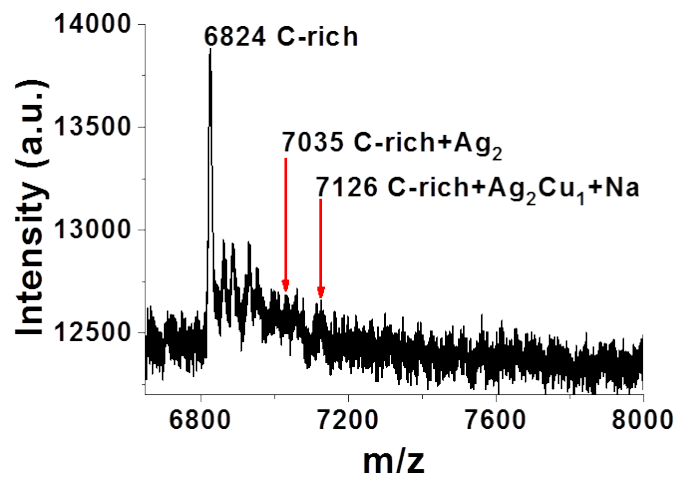

**Figure S4.** MALDI-TOF mass spectra of synthesized C-rich ssDNA templated silver nanoclusters in the presence of 1 mM Cu<sup>2+</sup> ions.
